1 Degradation of the incretin hormone Glucagon-Like Peptide-1 (GLP-1) by *Enterococcus*  
2 *faecalis* metalloprotease GeIE.

3

4 Stephanie L. LeValley<sup>a</sup>, Catherine Tomaro-Duchesneau<sup>a\*</sup>, Robert A. Britton<sup>a#</sup>.

5

6 <sup>a</sup>Department of Molecular Virology and Microbiology, Baylor College of Medicine,

7 Houston, Texas, USA

8

9 #Address correspondence to Robert A. Britton, robert.britton@bcm.edu

10 \*Present address: Catherine Tomaro-Duchesneau, StomoniX, Maple Grove, Minnesota,

11 USA

## 12 **Abstract**

13           Metabolic diseases, including Type 2 Diabetes and obesity, have become  
14 increasingly prevalent global health concerns. Studies over the past decade have  
15 established connections between the gastrointestinal microbiota and host metabolism,  
16 but the mechanisms behind these connections are only beginning to be understood. We  
17 were interested in identifying microbes that have the ability to modulate the levels of the  
18 incretin hormone glucagon like peptide 1 (GLP-1). Using a human derived cell line that  
19 is capable of secreting GLP-1 in response to stimulatory ligands (NCI-H716), we  
20 identified supernatants from several bacterial isolates that were capable of decreasing  
21 GLP-1 levels, including several strains of *Enterococcus faecalis*. We further identified  
22 the secreted protease GelE, an established virulence factor from *E. faecalis*, as being  
23 responsible for GLP-1 inhibition via direct cleavage of GLP-1 by GelE. Finally, we  
24 demonstrated that *E. faecalis* supernatants can disrupt a colonic epithelial monolayer  
25 and cleave GLP-1 in a *gelE* dependent manner. This work suggests that a secreted  
26 factor from an intestinal microbe can traverse the epithelial barrier and impact levels of  
27 an important intestinal hormone.

28

## 29 **Importance**

30           Humans have a complex and interconnected relationship with their  
31 gastrointestinal microbiomes, yet our interest in the microbiome tends to focus on overt  
32 pathogenic or probiotic activities, leaving the roles that commensal species may have  
33 on host physiology and metabolic processes largely unexplored. Commensal organisms  
34 in the microbiome produce and secrete many factors that have an opportunity to interact

35 with the gastrointestinal tract and host biology. Here we show that a secreted protease  
36 from *E. faecalis*, GelE, is able to degrade the gastrointestinal hormone GLP-1, which is  
37 responsible for regulating glucose homeostasis and appetite in the body. The disruption  
38 of natural GLP-1 signaling by GelE may have significant consequences for maintaining  
39 healthy blood glucose levels and in the development of metabolic disease. Furthermore,  
40 this work deepens our understanding of specific host-microbiome interactions.

## 41 **Introduction**

42           The human gastrointestinal (GI) tract is home to trillions of microorganisms,  
43 collectively referred to as the GI microbiome (1). Because of the direct physical  
44 proximity that the gut microbiome has with its human host, it is no surprise that the  
45 microbiome plays a role in multiple aspects of health, the best characterized of these  
46 being immune tolerance, pathogen resistance, and digestion (2). Less understood are  
47 the interactions between the microbiome and human metabolism. Despite limited  
48 mechanistic insight into the cross-section of microbiome and host metabolism, it is of  
49 great interest as both an etiology of disease and for potential therapeutic applications,  
50 and some understanding is beginning to emerge. The first insights into microbial  
51 influence over human metabolism came from studies demonstrating that the simple  
52 absence of a microbiome resulted in decreased total body fat in germ-free mice,  
53 compared to conventional mice, independent of food intake; further, the decrease in fat  
54 mass could be gained back by colonizing the germ-free mice with bacterial communities  
55 from conventionally raised mice (3). The observed ability of the microbiome to help  
56 harvest energy from the diet sparked a variety of research studies over the next decade,  
57 with a focus on the interaction of the microbiome with GI hormone peptides, in particular  
58 the nutrient-stimulated incretin Glucagon-like Peptide-1 (GLP-1). Already a therapeutic  
59 target for Type 2 Diabetes (T2D), GLP-1 is an integral signaling hormone responsible  
60 for promoting insulin secretion and satiety, while decreasing glucagon secretion and  
61 gastric emptying. Early work showed that addition of the prebiotic oligofructose to the  
62 diets of rats on a high-fat diet increased GLP-1 levels measured from the portal vein, in  
63 addition to protecting from weight gain (4). Additional studies demonstrated that

64 administration of *Akkermansia muciniphila* could reverse high-fat diet induced metabolic  
65 disorders, and that this activity was mediated at least partially by an outer membrane  
66 protein purified from *A. muciniphila* interacting with Toll-like receptor 2 (5, 6). These  
67 studies strikingly demonstrate that a specific bacterial species and factor are capable of  
68 impacting metabolic disease phenotypes. Despite a heightened research interest,  
69 additional mechanisms behind how the microbiome and host metabolism influence each  
70 other still remain largely undescribed.

71         Some of the obvious suspects to investigate for host-microbiome interactions are  
72 the many secreted proteins and metabolites that bacteria release as part of their natural  
73 lifecycle. While these external products are often part of bacterial cellular metabolism or  
74 provide beneficial function to the bacterial cell, they also have an opportunity to interact  
75 with their environment, in this case the human GI tract. Here, our screening for bacterial  
76 modulators of GLP-1 revealed multiple bacterial strains that can inhibit GLP-1 levels in  
77 an in vitro assay. We further characterize this inhibition as direct cleavage from *E.*  
78 *faecalis* strains by its secreted protease GelE, revealing a novel cleavage target of  
79 GelE. Finally, we suggest a role for GelE in disrupting natural GLP-1 signaling and  
80 metabolic processes.

81

## 82 **Results**

### 83 *Screening a human-derived bacterial library for GLP-1 modulatory activity*

84         Bacterial strains capable of modulating GLP-1 levels were identified by an in vitro  
85 screening pipeline using the GLP-1 secreting human cell line NCI H716 (7). Over 1500  
86 cell-free supernatants collected from individual bacterial isolates were prepared and

87 applied to NCI H716 cell monolayers for 2 h, and secretion of GLP-1 into the medium  
88 was measured by ELISA. NCI H716 cell viability was also monitored by PrestoBlue Cell  
89 Viability Reagent to ensure no significant increase in NCI H716 cell lysis or death (data  
90 not shown). The majority of bacterial isolates screened had no impact on GLP-1 levels;  
91 however, approximately 20 isolates showed a marked decrease in GLP-1 levels, many  
92 of them below the limit of detection of the ELISA (**Figure 1A**). We also identified 45  
93 isolates that dramatically increase GLP-1 levels; these were further characterized in a  
94 separate study (8).

95 To identify the species of each isolate, the 16S rRNA gene was sequenced. The  
96 majority of the isolates identified as *Enterococcus faecalis*, as well as *Clostridium*  
97 *perfringens*, *C. bifermentans*, and *C. butyricum*. The *E. faecalis* isolates exhibited a  
98 stronger GLP-1 inhibitory effect, ranging between  $0\% \pm 0.0$  and  $5.44 \pm 9.1\%$  GLP-1,  
99 compared to media controls ( $p < 0.0001$ , **Figure 1B**). The *Clostridium* species, while still  
100 inhibitory, consistently show a slightly weaker inhibitory effect, ranging between  $8.0\% \pm$   
101  $4.6$  and  $15.2\% \pm 21.0$  GLP-1, compared to media controls ( $p < 0.0001$ , **Figure 1B**).  
102 Because of this difference in the GLP-1 inhibitory activities of *E. faecalis* and  
103 *Clostridium* species, we decided to further characterize the activity of the *E. faecalis*  
104 isolates.

105

#### 106 *Identifying the factor secreted from E. faecalis responsible for GLP-1 inhibition*

107 Size fractionation experiments showed that GLP-1 inhibitory activity from *E.*  
108 *faecalis* was contained within the 30-50 kDa size fraction of supernatant (**Figure S1**).  
109 We also found that the GLP-1 degradation activity was sensitive to heat and the metal

110 ion chelator N,N,N',N'-tetrakis(2-pyridylmethyl)ethane-1,2-diamine (TPEN) (**Figures S2**  
111 **and S3**). These data suggest the factor responsible for GLP-1 inhibitory activity is a  
112 secreted, metal-dependent protein. Two secreted proteases from *E. faecalis* are well  
113 known, the serine protease SprE and the metalloprotease GelE, both of which are  
114 regulated by the two-component, quorum-sensing *fsr* (*faecalis* system regulator) operon  
115 (9) (**Figure 2A**). We obtained strains of *E. faecalis* containing null mutations in *sprE*  
116 (TX5243), *gelE* (TX5264), *fsrB* (TX5266), and a *gelE*, *sprE* double mutant (TX5128), all  
117 generated in the commonly used wild-type OG1RF *E. faecalis* strain (10). To test the  
118 GLP-1 inhibitory activity of these strains, supernatants were incubated directly with  
119 recombinant GLP-1 (Tocris) (**Figure 2B**). Of the strains tested, only the  $\Delta$ *sprE* strain  
120 maintained GLP-1 inhibitory activity equal to that of wild-type OG1RF (OG1RF  $-0.06\% \pm$   
121  $0.76$ ,  $\Delta$ *sprE*  $-0.14\% \pm 0.74$ ,  $p < 0.0001$ ), while the  $\Delta$ *gelE*,  $\Delta$ *fsrB*, and  $\Delta$ *gelE*; $\Delta$ *sprE* strains  
122 no longer showed decreased GLP-1 levels ( $95.19\% \pm 4.48$ ,  $97.8\% \pm 7.37$ ,  $88.41\% \pm$   
123  $17.47$ , respectively). Taken together, the loss of GelE, either directly by knock-out or  
124 indirectly by dysregulation through FsrB, results in a loss of GLP-1 inhibitory activity,  
125 suggesting direct cleavage of GLP-1 by the metalloprotease GelE.

126 To further characterize GLP-1 cleavage by GelE, the expression of *gelE* in five *E.*  
127 *faecalis* isolates was measured by quantitative PCR in relation to their ability to cleave  
128 GLP-1 (**Figure 3**). During the initial screen, we identified one *E. faecalis* isolate that did  
129 not inhibit GLP-1, a clinical isolate *E. faecalis* S613 (from Cesar A. Arias's laboratory,  
130 University of Texas, Health Science Center) (11). The four GLP-1 degrading isolates  
131 highly express *gelE*, with expression levels at least 10-fold higher and up to 380-fold

132 higher than the non-GLP-1 degrading isolate S613, demonstrating a correlation  
133 between *gelE* expression and GLP-1 degradation.

134

### 135 *GelE* specificity for human metabolic substrates

136 Previously, it has been shown that GelE degrades a range of substrates (12);  
137 thus, we wanted to better understand the range and specificity of GelE cleavage targets  
138 relevant to GLP-1 and other proteins involved in human metabolism. Supernatants from  
139 *E. faecalis* strains 30054A, 30002, OG1RF,  $\Delta gelE$ ,  $\Delta sprE$ , and S613 were incubated  
140 with a panel of recombinant protein substrates (GLP-1, Glucose-dependent  
141 insulintropic peptide (GIP), Peptide YY (PYY), leptin, glucagon, pancreatic peptide,  
142 insulin, IL-6, tumor necrosis factor alpha (TNF $\alpha$ ), and monocyte chemoattractant  
143 protein-1 (MCP-1)) and quantified by a Luminex assay. From our findings, GelE is  
144 capable of degrading, to some extent, nearly all the substrates tested in the metabolic  
145 panel (**Figure 4**); however, some patterns of degradation emerged. Recapitulating our  
146 previous findings, GLP-1 levels were reduced to 0.57%  $\pm$  0.13, down to the limit of  
147 detection of the assay. Similar degradation was observed for GIP, glucagon, leptin,  
148 PYY, and pancreatic peptide. For insulin, MCP-1, and TNF $\alpha$ , degradation was less  
149 striking, but still statistically significant. Finally, we did not observe consistent  
150 degradation of IL-6 by GelE.

151 To gain a better understanding of the substrate preference of GelE, we also  
152 tested the ability of diluted supernatants of *E. faecalis* 30054A, from 1-0.0001X, to  
153 degrade the same panel of metabolic substrates (**Table 1**). Most prominently,  
154 supernatant from *E. faecalis* 30054A diluted to 0.01X still degraded the majority of GLP-



155 1 present, leaving only  $10.38\% \pm 3.52$  GLP-1 remaining. GIP, glucagon, and leptin also  
156 show high degradation with diluted supernatants ( $1.55\% \pm 1.09$ ,  $3.08\% \pm 3.25$ , and  
157  $7.95\% \pm 4.72$  substrate remaining, respectively, for 0.1X supernatants). This level of  
158 degradation does not hold true for all substrates tested: pancreatic peptide and PYY  
159 maintain fairly high levels of degradation with undiluted supernatants ( $10.35\% \pm 2.4$  and  
160  $10.45\% \pm 3.1$  substrate remaining, respectively, for undiluted supernatants), but  
161 degradation lessens upon dilution ( $47.49\% \pm 17.15$  and  $54.61\% \pm 13.14$  substrate  
162 remaining, respectively, for 0.1X supernatants). Finally, MCP-1,  $\text{TNF}\alpha$ , and insulin show  
163 less degradation even with undiluted supernatants ( $35.14\% \pm 14.1$ ,  $39.73\% \pm 8.0$ , and  
164  $57.29\% \pm 7.7$  substrate remaining, respectively, for undiluted supernatants).

165

#### 166 *Interaction of GelE and GLP-1 through an epithelial layer*

167 While GelE from *E. faecalis* may readily cleave GLP-1 and other substrates in  
168 vitro, it is important to consider the GI epithelium separating these two molecules in  
169 vivo. Previous work has implicated *E. faecalis*, and specifically GelE, in contributing to  
170 intestinal epithelium disruption (13-15). We aimed to model the ability of GelE to contact  
171 GLP-1 through an epithelial layer using T84 epithelial cells in a transwell format, to  
172 mimic the microbial interface on the apical side and the presence of GLP-1 on the  
173 basolateral side of the epithelium (**Figure 5A**). The integrity of the T84 epithelial layer,  
174 as measured by transepithelial electrical resistance, decreased by approximately half  
175 with the apical addition of cell-free *E. faecalis* supernatants expressing GelE, 30054A  
176 and OG1RF ( $52.2\% \pm 17.97$ ,  $p = 0.0022$  and  $65.5\% \pm 9.47$ ,  $p = 0.0439$ , respectively,  
177 compared to DMEM/F12 T84 cell culture media control); while *E. faecalis* supernatants

178 lacking GelE,  $\Delta$ gelE and S613, increased the integrity of the epithelial layer ( $156.6\% \pm$   
179  $24.76$ ,  $p = 0.0045$  and  $153.7\% \pm 18.93$ ,  $p = 0.0084$ , respectively, compared to  
180 DMEM/F12 T84 cell culture media control) (**Figure 5B**).

181 The basolateral compartment of each transwell contained approximately 500 pM  
182 GLP-1 supplemented into the DMEM/F12 media. When GelE containing supernatants  
183 30054A or OG1RF were added apically to the T84 cell epithelial layer, GLP-1 in the  
184 basolateral compartment was cleaved nearly completely ( $3.1\% \pm 2.68$ ,  $p < 0.0001$  and  
185  $1.6\% \pm 0.46$ ,  $p < 0.0001$  respectively, compared to DMEM/F12 T84 cell culture media  
186 control), while GLP-1 in the basolateral compartment of apical supernatants from  $\Delta$ gelE  
187 and S613 *E. faecalis* strains, remained intact (**Figure 5B**). Together, these data  
188 demonstrate that GelE causes moderate damage to an epithelial layer, allowing access  
189 to the basolateral side where it can cleave GLP-1.

190

## 191 **Discussion**

192 Bacterial cells secrete a wide range of proteins and metabolites during their  
193 lifecycle, and one such class of secreted molecules are proteases, enzymes that break  
194 down other proteins or peptides. A well-studied example of this is *Enterococcus faecalis*  
195 and its gelatinase GelE. A secreted metalloprotease, GelE serves *E. faecalis* by  
196 degrading misfolded surface proteins and decreasing chain length for dissemination  
197 (16). A role for GelE in preventing biofilm formation has also been described by multiple  
198 research groups (17, 18).

199 Because *E. faecalis* has been implicated in various infections, including  
200 endocarditis, bacteremia, and urinary tract infections (19), GelE has been studied for its

201 interaction with human proteins. A thorough characterization of GelE revealed multiple  
202 host cleavage targets, including glucagon and cholecystinin, among several other  
203 substrates (12). More recently, GelE has been shown to cleave the C3- $\alpha$  chain of the  
204 human complement system, promoting immune evasion (20). Additionally, GelE can  
205 degrade the tight junction protein E-cadherin, contributing to intestinal inflammation and  
206 impaired barrier integrity (13). Our work adds GLP-1, among other metabolic factors, to  
207 the list of GelE targets.

208         Our data from Luminex assays using a panel of metabolic substrates show that  
209 GelE is able to degrade more substrates than previously suspected, and furthermore,  
210 that GelE has an enhanced ability to degrade some substrates over others, including  
211 GLP-1, GIP, glucagon, and leptin. If occurring in the human body, degradation of these  
212 various substrates could have differing, sometimes contradictory, effects on host  
213 metabolic processes. GLP-1, GIP, and PYY are secreted basolaterally by  
214 enteroendocrine cells and have beneficial functions for host metabolism, and their  
215 absence would likely permit a change in glucose homeostasis, leading to  
216 hyperglycemia, and an increase in food intake. Made and secreted in the pancreas,  
217 degradation of insulin by GelE would likely result in similar hyperglycemia, and a  
218 reduction in pancreatic peptide might allow for increased food intake. Conversely,  
219 degradation of glucagon from alpha cells of the pancreas might result in hypoglycemia.  
220 Leptin is produced in adipocytes, and its degradation would likely cause dysregulation  
221 of fat accumulation and processing. Finally, MCP-1 and TNF $\alpha$  are pro-inflammatory  
222 cytokines, and disruption of their signaling by degradation from GelE might delay an  
223 immune response during pathogen invasion. Importantly, whether these cleavage

224 events are occurring and have relevant consequences in a whole biological system  
225 needs to be confirmed in animal studies. Based on proximity, GelE crossing the  
226 epithelial layer would first encounter molecules secreted into the lamina propria, and so  
227 we suspect GI hormones such as GLP-1, GIP, and PYY would be primary targets for  
228 degradation by GelE.

229         Our study supports the findings that *E. faecalis* and its protease GelE can  
230 compromise an epithelial layer and gain access to the basolateral environment (13-15).  
231 This is not surprising from a clinical perspective, as *E. faecalis* is implicated in cases of  
232 bacteremia and sepsis (23). For the topic of this study, this access could allow GelE to  
233 contact vital substrates responsible for host metabolic homeostasis as they are secreted  
234 into the GI lamina propria. Even mild inflammation often observed in individuals with  
235 metabolic syndrome, coupled with bacterial instigators like GelE from *E. faecalis*, could  
236 create a weakened epithelium (24). Once the integrity of the epithelium is damaged,  
237 luminal contents have an opportunity to move from the lumen of the GI tract and into the  
238 lamina propria just on the other side of the epithelial layer, where many hormones and  
239 metabolites are secreted before moving into the circulatory system. Furthermore, there  
240 is little indication regarding whether GelE could also be capable of diffusing into  
241 circulation as most hormones and nutrients do. Additionally, others have demonstrated  
242 by proof of concept that the microbiome encodes DPP-4 like activity that can traverse  
243 the epithelium, and further propose that this activity is capable of modulating protein  
244 digestion and ultimately host metabolism and behavior (25); while DPP-4 and GelE  
245 work via different proteolytic mechanisms, the idea of bacterial proteases modulating  
246 host proteins and peptides is gaining traction.

247           Interestingly, the *Enterococcus* genus has been linked to obesity in children and  
248 adolescents, as well as to mice consuming a western diet (21, 22). While not  
249 characterized in this study, we also identified several *Clostridium* isolates whose  
250 supernatants are capable of decreasing GLP-1 levels in vitro. We suspect this activity is  
251 also the result of a secreted protease cleaving GLP-1, supporting the idea that the  
252 microbiome produces a suite of proteases capable of interfering with host metabolism.  
253 Although *E. faecalis* and *Clostridium* have been implicated in infection, but they can also  
254 behave as commensal organisms and often live inconspicuously in our GI tracts. It is  
255 important to understand all the interactions of these organisms with their host, not just  
256 the overt pathogenic functions.

257           In summary, the results of this study demonstrate that GeIE, a recognized  
258 virulence factor of *E. faecalis*, can degrade the human GI hormone GLP-1, among other  
259 metabolic substrates. The degradation of GLP-1 likely occurs by slight damage to the  
260 intestinal epithelium, allowing GeIE to translocate across the epithelial layer and access  
261 GLP-1. While it would be reckless to assume this activity is an etiology of metabolic  
262 disease, we do believe that interference with natural GLP-1 signaling by microbial  
263 degradation of GLP-1 could be a contributing factor to the development of disease. An  
264 important next step for this work is to assess the contribution of GeIE to intestinal barrier  
265 permeability and the development of metabolic syndrome in vivo. Finally, this study  
266 adds a novel mechanism of action to the ever-growing list of host-microbe interactions.

267

## 268 **Materials and methods**

### 269 *Bacterial strain isolation*

270 Bacterial strains for screening were isolated previously from fecal, breast milk,  
271 and ileum biopsy samples (8). Genetic mutant strains of *Enterococcus faecalis*  
272 (OG1RF, TX5266 (*fsrB*), TX5264 (*gelE*), TX5243 (*sprE*), TX5128 (*gelE;sprE*)) were  
273 generously gifted from the Danielle A. Garsin Laboratory (University of Texas, Health  
274 Science Center) (10). *E. faecalis* S613 was generously gifted from the Cesar A. Arias  
275 Laboratory (University of Texas, Health Science Center) (11).

276

#### 277 *Bacterial growth and preparation of cell-free supernatants*

278 Bacterial isolates were streaked from frozen glycerol stocks onto GM17 agar  
279 plates and incubated anaerobically overnight at 37°C. One colony was inoculated into 5  
280 mL of GM17 broth and incubated overnight at 37°C followed by one more subculture  
281 into GM17 broth, and incubation overnight at 37°C. Once grown, bacterial cultures were  
282 centrifuged at 5000 x g for 20 min. Supernatants were collected and lyophilized  
283 (Labconco Freezone), followed by storage at -80°C until used for subsequent assays.

284

#### 285 *16S rRNA gene sequencing of isolates*

286 To identify the bacterial isolates, bacteria were streaked on GM17 (M17 + 0.5%  
287 (w/v) glucose) agar plates from frozen glycerol stocks and incubated at 37°C for 24-48  
288 h. Bacterial colony mass was then resuspended in 800 µL of sterile water and  
289 transferred to sterile bead beating tubes and homogenized for 2 min in a mini-  
290 beadbeater-96 (Biospec Products). Tubes were centrifuged at 8000 xg for 30 sec and  
291 supernatants were used for 16S rRNA gene PCR amplification with Phusion High-  
292 Fidelity DNA Polymerase (New England Biolabs) in a 20 µL reaction according to the

293 manufacturer's protocol, with sequencing primers 8F and 1492R. The amplification  
294 cycle consisted of an initial denaturation at 98°C for 30 sec, followed by 26 cycles of 10  
295 sec at 98°C, 20 sec at 51°C, and 1 min at 72°C. Amplification was verified by agarose  
296 gel electrophoresis. For sample cleanup, DNA was treated with Exo-SAP-IT  
297 (ThermoFisher) and incubated at 37°C for 15 min followed by a 15 min incubation at  
298 80°C to inactivate the enzyme. The product was cooled and sent to Genewiz for  
299 sequencing according to company protocol. Upon return of sequencing data, sequences  
300 were compared to the NCBI BLAST database.

301

### 302 *Screening for GLP-1 stimulatory activity using NCI H716 cells*

303 NCI H716 (American Type Culture Collection (ATCC) CCL-251) cells were grown  
304 in Roswell Park Memorial Institute (RPMI, ATCC) medium supplemented with 10% (v/v)  
305 heat inactivated newborn calf serum (NBCS, Gibco). Cultures were maintained at a  
306 concentration of  $2-8 \times 10^5$  cells/mL and used at passages 15-40 for cell studies. For cell  
307 studies, 96-well plates were coated with 100  $\mu$ L of 10 mg/mL Matrigel (BD Biosciences)  
308 for 2 h at room temperature. Following coating, NCI H716 cells were seeded at a  
309 concentration of  $1 \times 10^5$  cells/well in Dulbecco's Modified Eagle's Medium (DMEM)  
310 supplemented with 10% (v/v) NBCS, as determined by trypan blue staining using a  
311 hemocytometer. Two days later, lyophilized bacterial supernatants were resuspended in  
312 Krebs buffer (Sigma) containing bovine serum albumin (BSA, 0.2% w/v) and bovine bile  
313 (0.03% w/v) and incubated on the NCI H716 cells at 37°C with 5% CO<sub>2</sub>. 4-phorbol 12  
314 myristate 13-acetate (PMA, 2  $\mu$ M) was used as a positive control as it is a potent  
315 stimulator of GLP-1 secretion through activation of protein kinase C (PKC). Following a

316 2 h incubation, supernatants were collected and analyzed for total GLP-1 levels by  
317 ELISA (Millipore Sigma) according to the manufacturer's protocol. Cell viability was  
318 monitored using PrestoBlue Cell Viability Reagent (ThermoFisher Scientific) following  
319 the manufacturer's instructions.

320

#### 321 *Characterization studies (TPEN, heat, size)*

322 For metalloprotease inhibitor studies, *E. faecalis* strains were subcultured 0.1%  
323 (v/v) from an overnight culture into GM17 containing the indicated concentration of  
324 N,N,N',N'-tetrakis(2-pyridylmethyl)ethane-1,2-diamine (TPEN). Cultures were grown  
325 overnight, supernatants were collected as described above, and incubated with 500 pM  
326 GLP-1 (GenScript) for 4 h at room temperature, followed by storage at -80°C until ready  
327 for GLP-1 quantification by ELISA.

328 For heat treatment studies, bacterial supernatants were heated to 90°C for 30  
329 min. Samples were then used in an NCI H716 cell assay as described above, followed  
330 by storage at -80°C until ready for GLP-1 quantification by ELISA.

331 For size fractionation studies, bacterial supernatants were separated by size  
332 using centrifugal filter units (Amicon) and centrifuged as described above. Samples  
333 were then used in an NCI H716 cell assay as described above, followed by storage at -  
334 80°C until ready for GLP-1 quantification by ELISA.

335

#### 336 *Protease knock-out studies*

337 Supernatants from *E. faecalis* protease mutants and controls (OG1RF, TX5266  
338 (*fsrB*), TX5264 (*gelE*), TX5243 (*sprE*), TX5128 (*gelE;sprE*)) were collected from an



339 overnight culture grown in GM17 aerobically at 37°C by centrifugation as described  
340 above. Supernatants were incubated with 500 pM GLP-1 (Tocris or GenScript) for 4 h at  
341 room temperature, followed by storage at -80°C until ready for GLP-1 quantification by  
342 ELISA, as described above.

343

#### 344 *RNA collection and quantitation of gelE expression*

345 *E. faecalis* were subcultured 1% (v/v) from an overnight culture into GM17. After  
346 5 h incubation, cells were collected by centrifugation, resuspended in RNALater solution  
347 (Invitrogen), and stored at -80°C. Cells were washed in 1X PBS, resuspended in 1 mL  
348 RTL buffer (Qiagen RNeasy Kit) and lysed by bead beating (2 x 1 min) at 4°C followed  
349 by RNA extraction according to the manufacturer's instructions. cDNA was synthesized  
350 using Superscript III reverse transcriptase (Invitrogen) following the manufacturer's  
351 recommended protocol. Quantitative PCR reactions were performed using Power SYBR  
352 Green Master Mix (Applied Biosystems) with either *E. faecalis* 16s RNA (f: 5'-  
353 CCGAGTGCTTGCACTCAATTGG-3', r: 5'-CTCTTATGCCATGCGGCATAAAC-3') or  
354 gelE (f: 5'-CGGAACATACTGCCGGTTTAGA-3', r: 5'-TGGATTAGATGCACCCGAAAT-  
355 3') specific primers (Wang et al. 2011). The expression of gelE was normalized to that of  
356 the 16S RNA and the data were analyzed using the  $2^{-\Delta\Delta CT}$ .

357

#### 358 *Cell culture growth and assays of T84 monolayers*

359 Growth and assays of T84 cells were performed by methods described  
360 previously, with slight modifications (Zeng 2004, Hopper 2000). T84 human colonic  
361 epithelial cells (ATCC CCL-248) were propagated in tissue culture-treated T75 flasks

362 (CELLSTAR) as indicated by ATCC. When between 90-100% confluency, T84 cells  
363 were treated with 0.25% trypsin and plated onto 24-well, 3.0  $\mu\text{m}$  polycarbonate  
364 membrane transwell filters (Costar, 3415) at a density of  $8 \times 10^4$  cells/well. The electrical  
365 resistance of the monolayer was monitored over the course of 2-3 weeks, and  
366 monolayers with a transepithelial electrical resistance (TEER, Millipore Millicell ERS-2)  
367  $>800 \Omega/\text{cm}^2$  were used for GLP-1 cleavage assays.

368 To prepare bacteria, on the day of the assay *E. faecalis* strains were subcultured  
369 1% (v/v) from an overnight culture into GM17 and grown for 5 h as described above.  
370 Whole culture (cells + supernatant) samples were diluted in DMEM/F12 (Gibco) to a  
371 concentration of  $1 \times 10^7$  CFU/mL, and supernatant samples were diluted 50% in  
372 DMEM/F12. All samples were neutralized to a pH of 6.8-7 using 3M NaOH.

373 Once prepared, the TEER was measured for each monolayer, followed by 100  
374  $\mu\text{L}$  of *E. faecalis* sample added to the upper chamber of the transwell, and 500  $\mu\text{L}$  of  
375 tissue culture media containing 500 pM GLP-1 (GenScript) added to the lower chamber.  
376 After a 16 h incubation at  $37^\circ\text{C}$  in 5%  $\text{CO}_2$ , 200  $\mu\text{L}$  of media from the lower chamber  
377 was removed and stored at  $-80^\circ\text{C}$  until ready for GLP-1 quantification by ELISA, as  
378 described above. A final TEER measurement was taken for each monolayer.

379

### 380 *Luminex*

381 A Milliplex Multiplex assay was performed using a Metabolic Luminex kit  
382 (Millipore Sigma) to measure total GLP-1, glucagon, Gastric Inhibitory Peptide/Glucose  
383 Insuliotropic Peptide (GIP), leptin, Peptide YY (PYY), pancreatic peptide, insulin,  
384 monocyte chemoattractant protein-1 (MCP-1), interleukin-6 (IL-6), and tumor necrosis

385 factor alpha (TNF $\alpha$ ). Bacterial supernatants were collected from an overnight culture by  
386 centrifugation as described above, diluted in bacterial culture media as indicated, and  
387 incubated with recombinant protein (GenScript, Sigma, Tocris) of each analyte for 4 h at  
388 room temperature, followed by storage at -80°C until ready for analyte quantification.  
389 The Milliplex Multiplex assay was run according to the protocol provided by the  
390 manufacturer.

391

### 392 *Statistical analysis*

393 Statistical analyses were performed using GraphPad Prism version 8.0 (San  
394 Diego, CA, USA). Experimental results are expressed as means  $\pm$  standard deviation.  
395 Statistical significance was set at  $p < 0.05$ . One-way statistical comparisons were  
396 carried out using one-way analysis of variance (ANOVA), followed by multiple  
397 comparisons of the means using Tukey's post-hoc analysis, for the GLP-1 secretion  
398 experiments in NCI-H716 cells, protease knock-out mutation assay, and degradation  
399 preference of GeIE using a Luminex assay (undiluted supernatants). Two-way ANOVA  
400 analysis, followed by multiple comparisons of the means using Tukey's post-hoc  
401 analysis, was performed for the degradation preference of GeIE using a Luminex assay  
402 (diluted supernatants) and T84 cell experiments.

403 **Acknowledgements**

404           We would like to acknowledge the Functional Genomics and Microbiome Core of  
405 the Texas Medical Center Digestive Diseases Center at Baylor College of Medicine for  
406 the help and guidance performing the Luminex assays. Also, the laboratories of Danielle  
407 A. Garsin and Cesar A. Arias at the University of Texas, Heath Science Center for the  
408 generous donations of *E. faecalis* strains. This work was supported in part by Baylor  
409 College of Medicine seed funding. CTD acknowledges funding in the form of a  
410 postdoctoral fellowship from the Fonds de recherche santé Québec.

411

412 **Figures and tables**

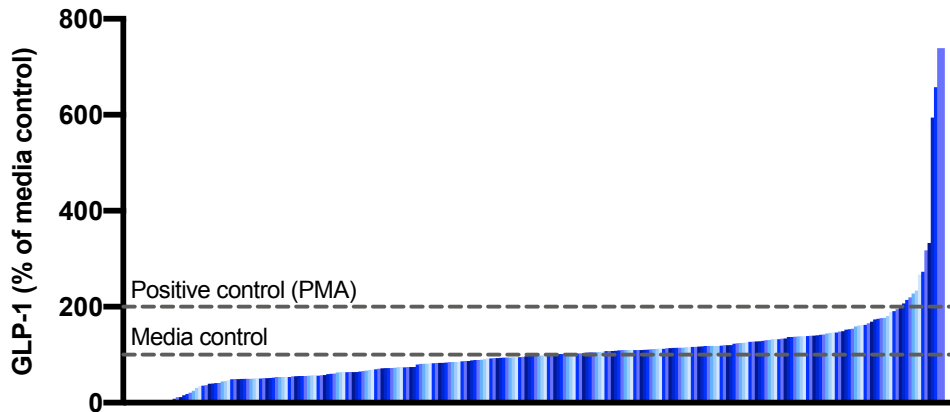

413 A.

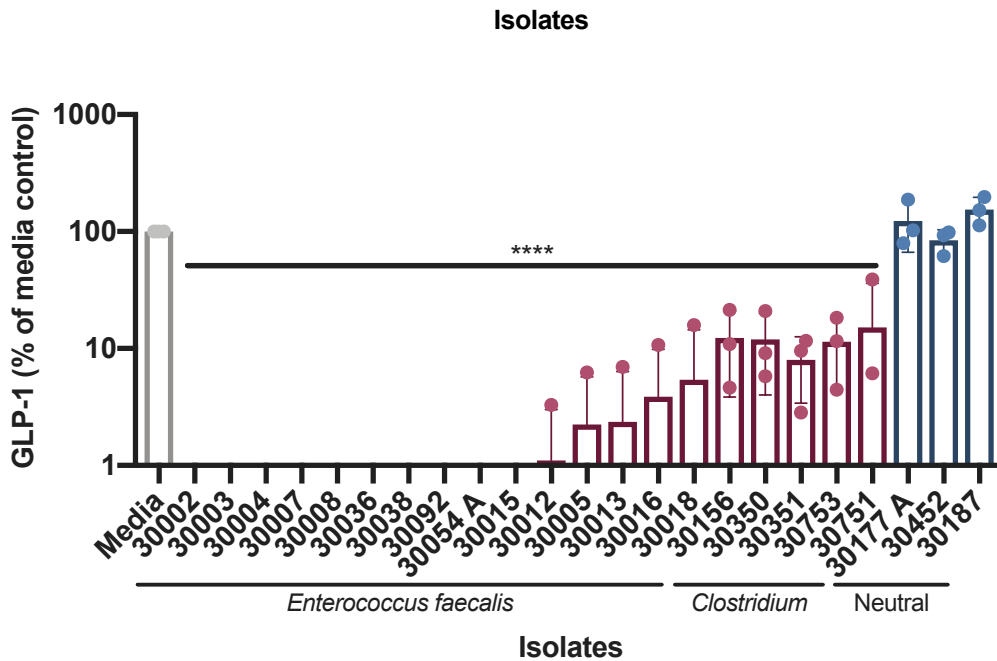

414 B.

415

416 **Figure 1. Screening for modulation of GLP-1** Bacterial supernatants have a wide range of effects on

417 GLP-1 secretion from NCI H716 cells (A). Multiple isolates of *Enterococcus faecalis* and *Clostridium*

418 decreased GLP-1 levels compared to media control (B). Data were obtained from three independent

419 experiments (n = 3) and expressed as mean values  $\pm$  SD (\*\*\*\*p < 0.0001).

420

A.

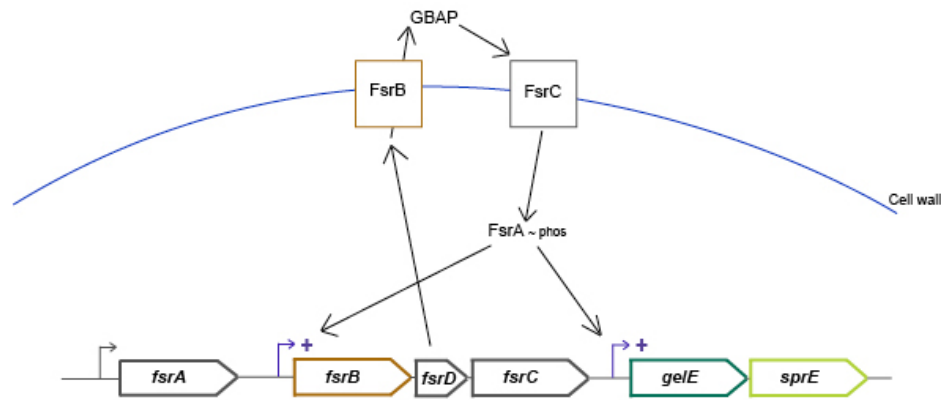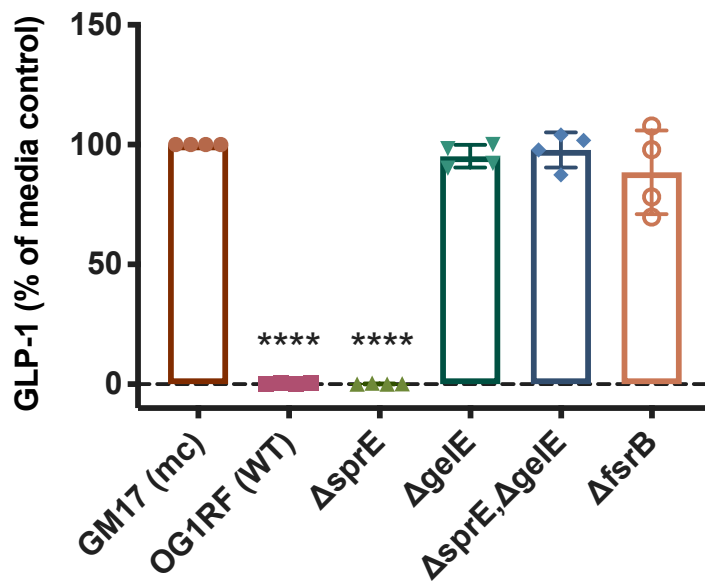

421

B.

422

423 **Figure 2. GelE is the factor responsible for GLP-1 inhibition** Genetic pathway for production of *E.*

424 *faecalis* proteases *gelE* and *sprE* (A). Activation of the quorum sensing system *fsr* activates transcription

425 of *gelE* and *sprE*, immediately downstream of the *fsr* operon. *E. faecalis* strains unable to produce a

426 functional GelE no longer deplete GLP-1 levels in an in vitro co-incubation of bacterial supernatants with

427 GLP-1 (B). Data were obtained from four independent experiments (n = 4) and expressed as mean

428 values  $\pm$  SD (\*\*\*\*p < 0.0001). GM17 (mc), bacterial culture media control.

429

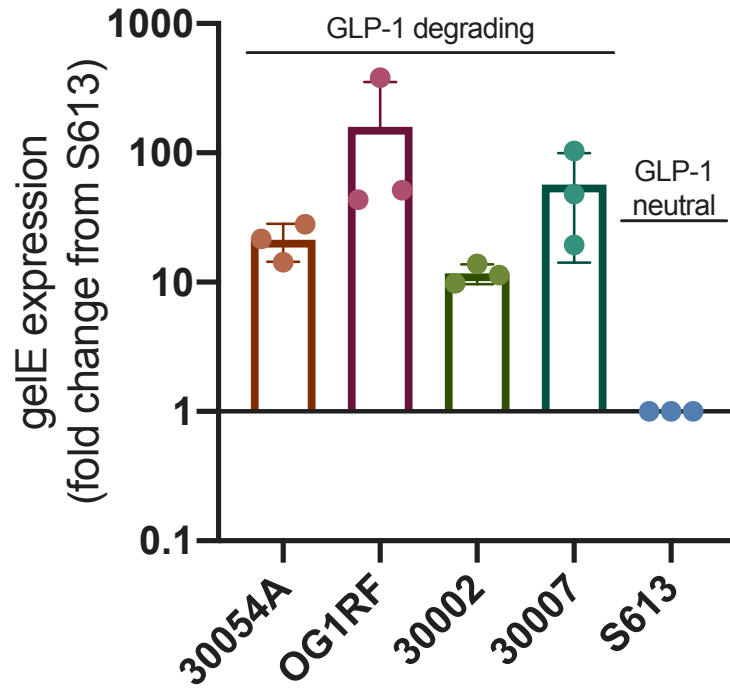

430

431

432 **Figure 3. Expression of *gelE* correlates with GLP-1 degradation** GLP-1 degrading strains of *E.*

433 *faecalis* have significantly higher expression levels of *gelE* compared to a GLP-1 neutral strain S613.

434 Data were obtained from three independent experiments (n = 3).

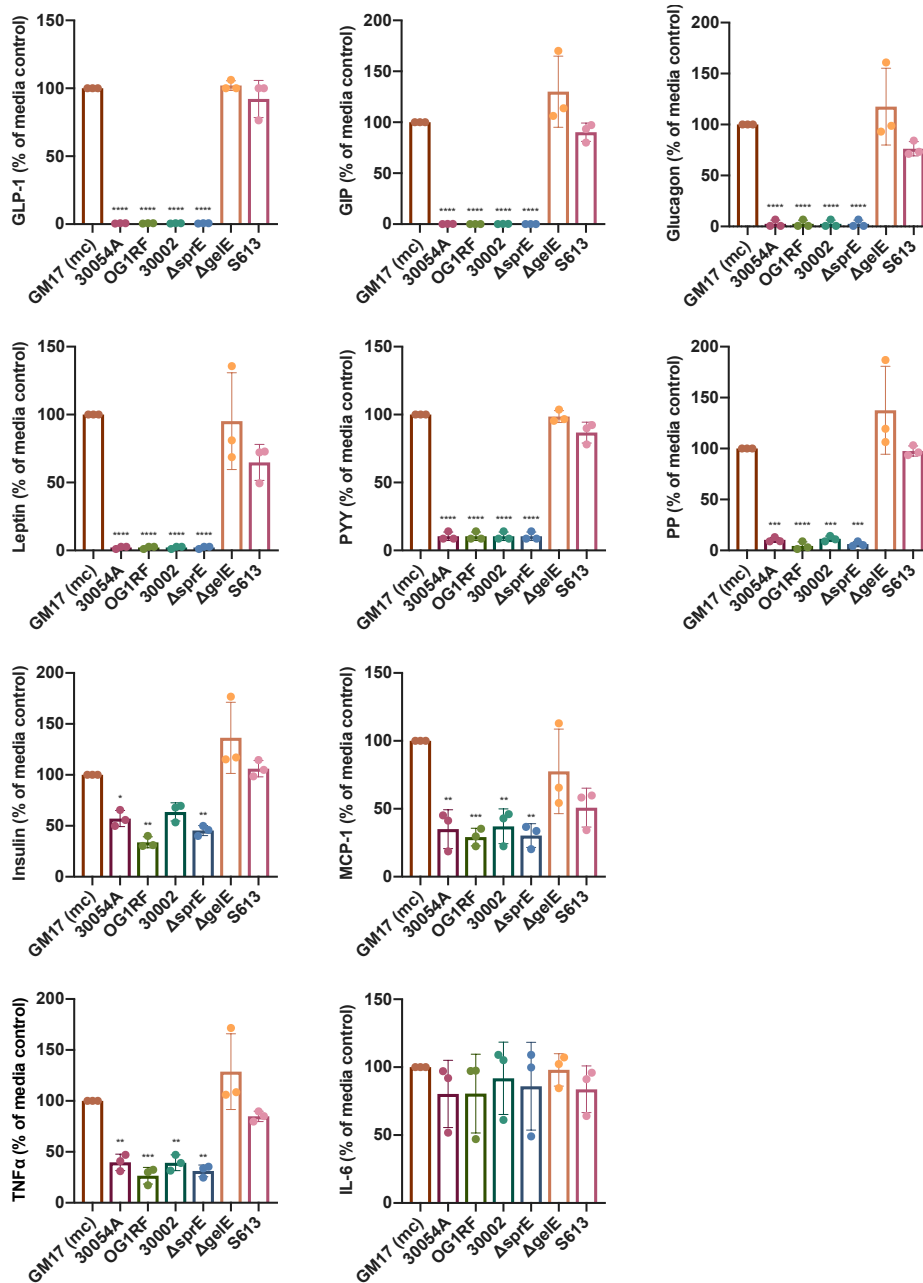

435

436 **Figure 4. GeIE specificity for human metabolic substrates** GeIE is capable of degrading many human

437 metabolic substrates Data were obtained from three independent experiments (n = 3) and expressed as

438 mean values ± SD (GLP-1, GIP, Glucagon, Leptin, PYY, and PP: \*\*\*\*p < 0.0001; Insulin: 30054A \*p =

439 0.0351, OG1RF \*p = 0.001, ΔsprE \*\*p = 0.0058; MCP-1: 30054A \*\*p = 0.0021, OG1RF \*\*\*p = 0.0009,

440 30002 \*\*p = 0.0029, ΔsprE \*\*p = 0.0011; TNFα: 30054A \*\*p = 0.0038, OG1RF \*\*\*p = 0.0006, 30002 \*\*p =

441 0.0036, ΔsprE \*\*p = 0.0012). GM17 (mc), bacterial culture media control.



442 **Table 1: Degradation of metabolic substrates by *E. faecalis* 30054A diluted supernatant** Dilutions of  
 443 supernatant from *E. faecalis* 30054A show an uneven distribution of degradation. Values represent the  
 444 quantity of substrate remaining after incubation with supernatants. Data were obtained from three  
 445 independent experiments (n = 3) and expressed as mean values  $\pm$  SD.

| Substrate          | Supernatant dilution |                   |                  |                   |                  |
|--------------------|----------------------|-------------------|------------------|-------------------|------------------|
|                    | 1x                   | 0.1x              | 0.01x            | 0.001x            | 0.0001x          |
| GLP-1              | 0.57 $\pm$ 0.13      | 0.71 $\pm$ 0.33   | 10.38 $\pm$ 3.52 | 90.12 $\pm$ 17.10 | 96.25 $\pm$ 6.50 |
| GIP                | 0.17 $\pm$ 0.06      | 1.55 $\pm$ 1.09   | 43.34 $\pm$ 1.19 | 96.32 $\pm$ 2.55  | 98.40 $\pm$ 1.40 |
| Glucagon           | 2.66 $\pm$ 3.59      | 3.08 $\pm$ 3.25   | 31.98 $\pm$ 6.09 | 86.37 $\pm$ 3.87  | 96.74 $\pm$ 2.83 |
| Leptin             | 2.15 $\pm$ 0.96      | 7.95 $\pm$ 4.72   | 72.29 $\pm$ 1.72 | 99.78 $\pm$ 0.39  | 97.77 $\pm$ 3.87 |
| Pancreatic peptide | 10.35 $\pm$ 2.36     | 47.49 $\pm$ 17.15 | 90.51 $\pm$ 3.41 | 99.19 $\pm$ 0.91  | 98.02 $\pm$ 1.70 |
| PYY                | 10.45 $\pm$ 3.08     | 54.61 $\pm$ 13.14 | 94.26 $\pm$ 0.43 | 98.82 $\pm$ 1.30  | 99.02 $\pm$ 0.88 |
| MCP-1              | 35.14 $\pm$ 14.14    | 74.03 $\pm$ 44.98 | 99.92 $\pm$ 0.14 | 99.99 $\pm$ 0.01  | 98.33 $\pm$ 2.89 |
| TNF $\alpha$       | 39.73 $\pm$ 8.05     | 87.87 $\pm$ 19.41 | 99.72 $\pm$ 0.48 | 99.28 $\pm$ 1.25  | 98.12 $\pm$ 1.67 |
| Insulin            | 57.29 $\pm$ 7.69     | 82.24 $\pm$ 14.59 | 99.77 $\pm$ 0.40 | 99.97 $\pm$ 0.05  | 99.23 $\pm$ 1.33 |
| IL-6               | 80.28 $\pm$ 24.77    | 99.78 $\pm$ 0.37  | 99.91 $\pm$ 0.15 | 95.75 $\pm$ 7.36  | 95.74 $\pm$ 6.94 |

446 **<15% (high) degradation**

447 **15-40% (moderate) degradation**

448 **40-60% (mild) degradation**

449 **>60% (low) degradation**

450

451  
452

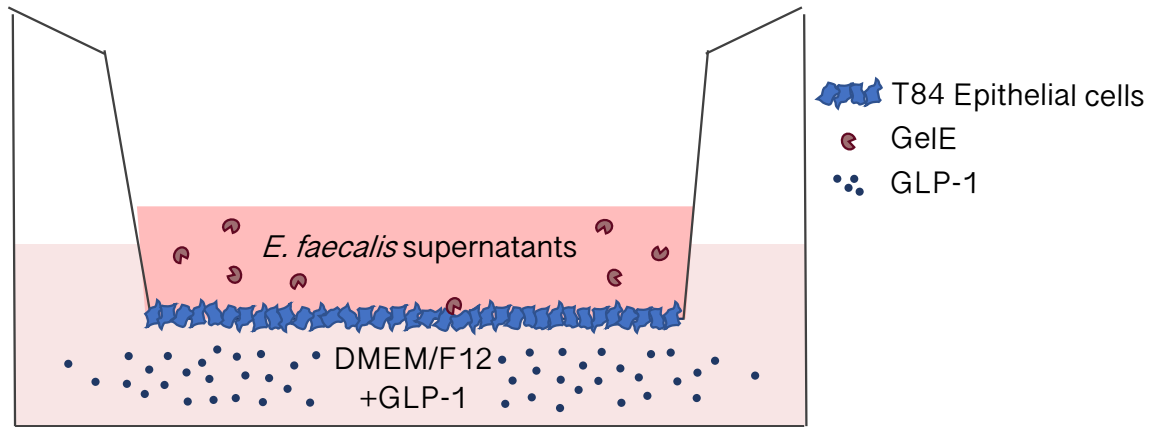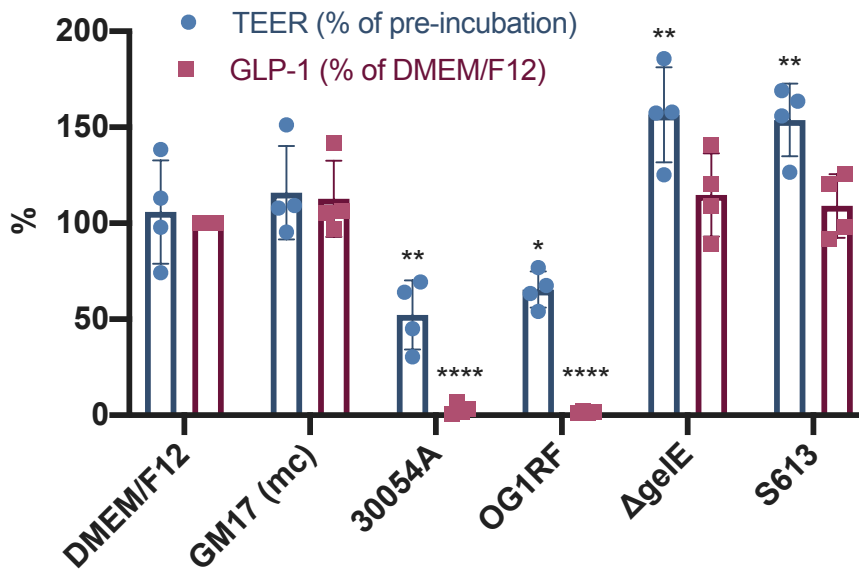

453  
454  
455  
456  
457  
458  
459  
460  
461

B.

***E. faecalis* supernatant treatment**

**Figure 5. Degradation of GLP-1 through T84 epithelial layer** Schematic of experimental setup: T84

epithelial cells seeded onto transwell insert, with *E. faecalis* supernatants added to the upper chamber and GLP-1 in cell culture media (DMEM/F12) to the lower chamber (A) Schematic not drawn to scale.

ΔgelE producing supernatants decrease the integrity of a T84 epithelial cell layer while degrading GLP-1

on the basolateral side of the epithelium, compared to DMEM/F12 T84 cell culture media control (B). Data

were obtained from four independent experiments and expressed as mean values ± SD (TEER: 30054A

\*\*p = 0.0022, OG1RF \*p = 0.0439, ΔgelE \*\*p = 0.0045, S613 \*\*p = 0.0084; GLP-1: 30054A and OG1RF

\*\*\*\*p < 0.0001). GM17 (mc), bacterial culture media control.

462 **Supplemental figures:**

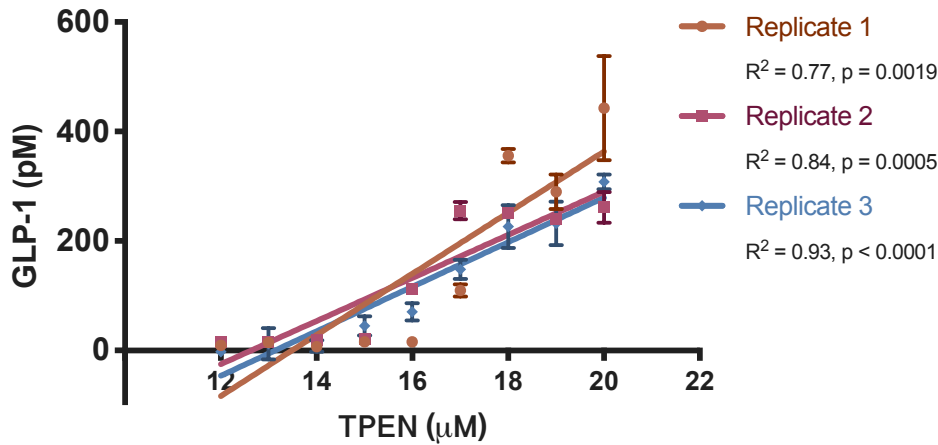

463

464 **S1. GLP-1 inhibitory activity is sensitive to TPEN.** Supernatants from *E. faecalis* 30054A grown  
465 overnight with increasing amounts of metalloprotease inhibitor TPEN (higher specificity for zinc) result in a  
466 reduction of GLP-1 degradation when incubated with recombinant GLP-1, in a dose-dependent manner.

467

468

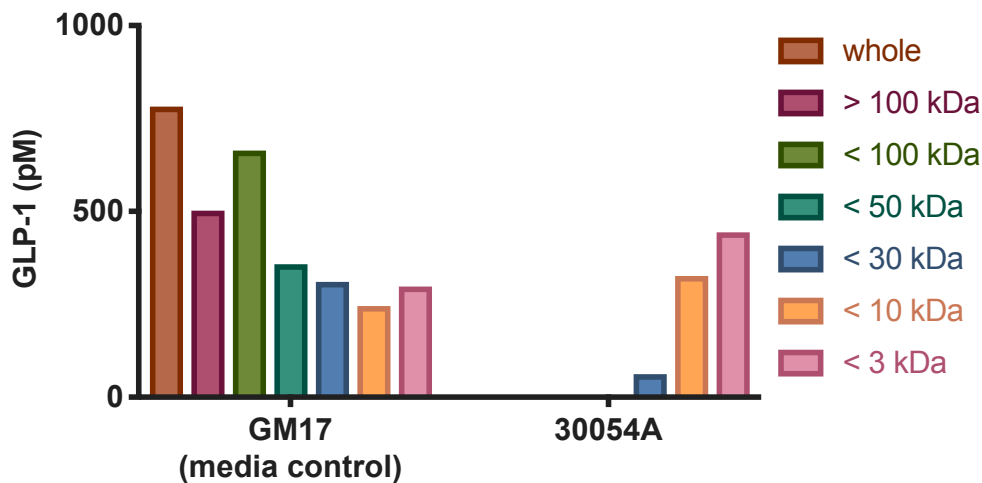

469

470 **S2. GLP-1 inhibitory activity is contained in the >30 kDa size fraction.** Supernatants from *E. faecalis*  
471 30054A were fractionated using centrifugal filters of various kDa cutoffs, and then incubated on NCI H716  
472 cells. GLP-1 inhibitory activity is maintained in all fractions >30 kDa.

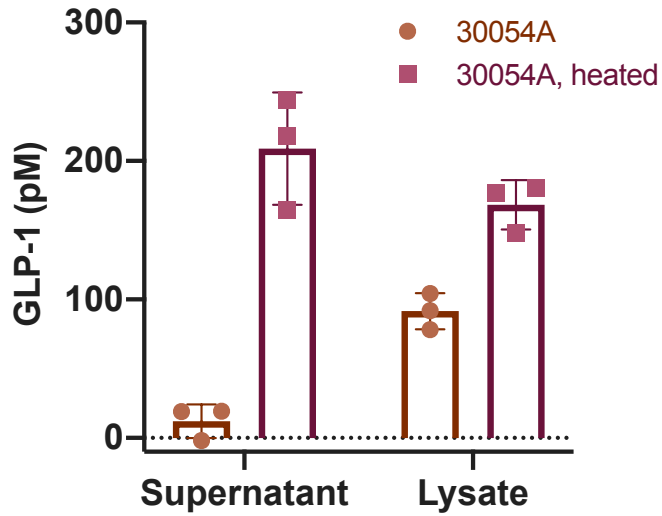

473

474 **S3. GLP-1 inhibitory activity is lost with heat treatment.** Supernatants and whole cell lysates from *E.*

475 *faecalis* 30054A treated to 30 min at 100°C result in a reduction of GLP-1 inhibitory activity when

476 incubated with NCI H716 cells. GLP-1 inhibitory activity is primarily contained in the bacterial supernatant

477 as opposed to the cellular lysate.

478

479 **Bibliography**

- 480 1. **Gilbert JA, Blaser MJ, Caporaso JG, Jansson JK, Lynch SV, Knight R.** 2018.  
481 Current understanding of the human microbiome. *Nat Med* **24**:392-400.
- 482 2. **Lynch SV, Pedersen O.** 2016. The Human Intestinal Microbiome in Health and  
483 Disease. *New England Journal of Medicine* **375**:2369-2379.
- 484 3. **Bäckhed F, Ding H, Wang T, Hooper LV, Koh GY, Nagy A, Semenkovich CF,**  
485 **Gordon JI.** 2004. The gut microbiota as an environmental factor that regulates  
486 fat storage. *Proceedings of the National Academy of Sciences of the United*  
487 *States of America* **101**:15718.
- 488 4. **Cani PD, Neyrinck AM, Maton N, Delzenne NM.** 2005. Oligofructose Promotes  
489 Satiety in Rats Fed a High-Fat Diet: Involvement of Glucagon-Like Peptide-1.  
490 *Obesity Research* **13**:1000-1007.
- 491 5. **Everard A, Belzer C, Geurts L, Ouwerkerk JP, Druart C, Bindels LB, Guiot Y,**  
492 **Derrien M, Muccioli GG, Delzenne NM, de Vos WM, Cani PD.** 2013. Cross-talk  
493 between *Akkermansia muciniphila* and intestinal epithelium  
494 controls diet-induced obesity. *Proceedings of the National Academy of Sciences*  
495 **110**:9066.
- 496 6. **Plovier H, Everard A, Druart C, Depommier C, Van Hul M, Geurts L, Chilloux**  
497 **J, Ottman N, Duparc T, Lichtenstein L, Myridakis A, Delzenne NM, Klievink**  
498 **J, Bhattacharjee A, van der Ark KC, Aalvink S, Martinez LO, Dumas ME,**  
499 **Maiter D, Loumaye A, Hermans MP, Thissen JP, Belzer C, de Vos WM, Cani**  
500 **PD.** 2017. A purified membrane protein from *Akkermansia muciniphila* or the

- 501 pasteurized bacterium improves metabolism in obese and diabetic mice. *Nat*  
502 *Med* **23**:107-113.
- 503 7. **Reimer RA, Darimont C, Gremlich S, Nicolas-Metral V, Ruegg UT, Mace K.**  
504 2001. A human cellular model for studying the regulation of glucagon-like  
505 peptide-1 secretion. *Endocrinology* **142**:4522-4528.
- 506 8. **Tomaro-Duchesneau C, LeValley SL, Röth D, Sun L, Horrigan FT, Kalkum**  
507 **M, Hyser JM, Britton RA.** 2018. Discovery of a bacterial peptide as a modulator  
508 of GLP-1 and metabolic disease. *bioRxiv* doi:10.1101/379503:379503.
- 509 9. **Podbielski A, Kreikemeyer B.** 2004. Cell density--dependent regulation: basic  
510 principles and effects on the virulence of Gram-positive cocci. *Int J Infect Dis*  
511 **8**:81-95.
- 512 10. **Cruz MR, Graham CE, Gagliano BC, Lorenz MC, Garsin DA.** 2013.  
513 *Enterococcus faecalis* inhibits hyphal morphogenesis and virulence of *Candida*  
514 *albicans*. *Infect Immun* **81**:189-200.
- 515 11. **Arias CA, Panesso D, McGrath DM, Qin X, Mojica MF, Miller C, Diaz L, Tran**  
516 **TT, Rincon S, Barbu EM, Reyes J, Roh JH, Lobos E, Sodergren E,**  
517 **Pasqualini R, Arap W, Quinn JP, Shamooy Y, Murray BE, Weinstock GM.**  
518 2011. Genetic Basis for In Vivo Daptomycin Resistance in Enterococci. *New*  
519 *England Journal of Medicine* **365**:892-900.
- 520 12. **Makinen PL, Clewell DB, An F, Makinen KK.** 1989. Purification and substrate  
521 specificity of a strongly hydrophobic extracellular metalloendopeptidase  
522 ("gelatinase") from *Streptococcus faecalis* (strain OG1-10). *J Biol Chem*  
523 **264**:3325-3334.

- 524 13. **Steck N, Hoffmann M, Sava IG, Kim SC, Hahne H, Tonkonogy SL, Mair K,**  
525 **Krueger D, Pruteanu M, Shanahan F, Vogelmann R, Schemann M, Kuster B,**  
526 **Sartor RB, Haller D.** 2011. Enterococcus faecalis metalloprotease compromises  
527 epithelial barrier and contributes to intestinal inflammation. Gastroenterology  
528 **141:959-971.**
- 529 14. **Zeng J, Teng F, Murray BE.** 2005. Gelatinase is important for translocation of  
530 Enterococcus faecalis across polarized human enterocyte-like T84 cells. Infect  
531 Immun **73:1606-1612.**
- 532 15. **Maharshak N, Huh EY, Paiboonrungruang C, Shanahan M, Thurlow L,**  
533 **Herzog J, Djukic Z, Orlando R, Pawlinski R, Ellermann M, Borst L, Patel S,**  
534 **Dotan I, Sartor RB, Carroll IM.** 2015. Enterococcus faecalis Gelatinase  
535 Mediates Intestinal Permeability via Protease-Activated Receptor 2. Infect Immun  
536 **83:2762-2770.**
- 537 16. **Waters CM, Antiporta MH, Murray BE, Dunny GM.** 2003. Role of the  
538 Enterococcus faecalis GelE protease in determination of cellular chain length,  
539 supernatant pheromone levels, and degradation of fibrin and misfolded surface  
540 proteins. J Bacteriol **185:3613-3623.**
- 541 17. **Hancock LE, Perego M.** 2004. The *Enterococcus faecalis*  
542 *fsr* Two-Component System Controls Biofilm Development through  
543 Production of Gelatinase. Journal of Bacteriology **186:5629.**
- 544 18. **Mohamed JA, Huang W, Nallapareddy SR, Teng F, Murray BE.** 2004.  
545 Influence of Origin of Isolates, Especially Endocarditis Isolates, and Various

- 546 Genes on Biofilm Formation by *Enterococcus faecalis*.
- 547 Infection and Immunity **72**:3658.
- 548 19. **Shaked H, Carmeli Y, Schwartz D, Siegman-Igra Y.** 2006. Enterococcal
- 549 bacteraemia: epidemiological, microbiological, clinical and prognostic
- 550 characteristics, and the impact of high level gentamicin resistance. Scand J Infect
- 551 Dis **38**:995-1000.
- 552 20. **Park SY, Shin YP, Kim CH, Park HJ, Seong YS, Kim BS, Seo SJ, Lee IH.**
- 553 2008. Immune Evasion of *Enterococcus faecalis* by an
- 554 Extracellular Gelatinase That Cleaves C3 and iC3b. The Journal of Immunology
- 555 **181**:6328.
- 556 21. **Hou Y-P, He Q-Q, Ouyang H-M, Peng H-S, Wang Q, Li J, Lv X-F, Zheng Y-N,**
- 557 **Li S-C, Liu H-L, Yin A-H.** 2017. Human Gut Microbiota Associated with Obesity
- 558 in Chinese Children and Adolescents. BioMed research international
- 559 **2017**:7585989-7585989.
- 560 22. **Turnbaugh PJ, Ridaura VK, Faith JJ, Rey FE, Knight R, Gordon JI.** 2009.
- 561 The effect of diet on the human gut microbiome: a metagenomic analysis in
- 562 humanized gnotobiotic mice. Science translational medicine **1**:14-16.
- 563 23. **Shaked H, Carmeli Y, Schwartz D, Siegman-Igra Y.** 2006. Enterococcal
- 564 bacteraemia: Epidemiological, microbiological, clinical and prognostic
- 565 characteristics, and the impact of high level gentamicin resistance. Scandinavian
- 566 Journal of Infectious Diseases **38**:995-1000.
- 567 24. **Zietek T, Rath E.** 2016. Inflammation Meets Metabolic Disease: Gut Feeling
- 568 Mediated by GLP-1. Frontiers in Immunology **7**.



- 569 25. **Olivares M, Schüppel V, Hassan AM, Beaumont M, Neyrinck AM, Bindels**  
570 **LB, Benítez-Páez A, Sanz Y, Haller D, Holzer P, Delzenne NM.** 2018. The  
571 Potential Role of the Dipeptidyl Peptidase-4-Like Activity From the Gut Microbiota  
572 on the Host Health. *Frontiers in Microbiology* **9**:1900.  
573
